# Supplementary material for: Graphene-based surface heater for de-icing applications
Source: Royal Society of Chemistry journal article supplement (doi:10.1039/c8ra02567c), 2018-01-01
Supplement: c8ra02567c1.pdf [file c8ra02567c1.pdf]

## Graphene-Based Surface Heating for De-icing Applications

Nazmul Karim,<sup>1\*</sup> Minglonghai Zhang,<sup>2</sup> Shaila Afroj,<sup>1,3</sup> Vivek Koncherry,<sup>2,4</sup> Prasad Potluri,<sup>2,4</sup> and Kostya S Novoselov<sup>1,3</sup>

<sup>1</sup>The National Graphene Institute (NGI), The University of Manchester, Booth Street East, Manchester, M13 9PL, UK

<sup>2</sup>School of Materials, The University of Manchester, Oxford Road, Manchester, M13 9PL, UK

<sup>3</sup>School of Physics & Astronomy, The University of Manchester, Oxford Road, Manchester, M13 9PL, UK

<sup>4</sup>The Northwest Composites Centre, The University of Manchester, Oxford Road, Manchester, M13 9PL, UK

\*Corresponding author E-mail: [mdnazmul.karim@manchester.ac.uk](mailto:mdnazmul.karim@manchester.ac.uk);

**Keywords:** graphene ink, de-icing composites, glass fibre, joule heating and smart composites

### Supporting Information:

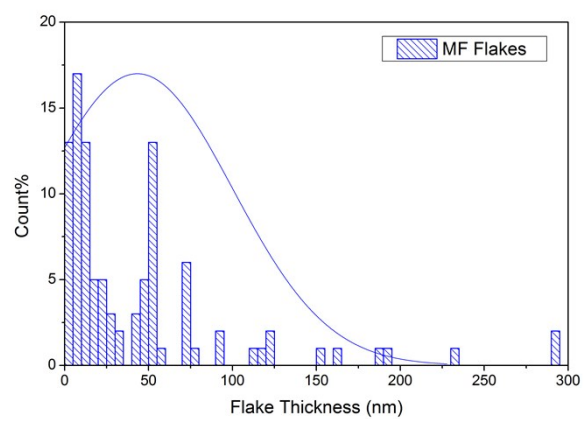

Figure S1. Flake thickness distribution of MF flakes

## Supporting Information: High Resolution XPS spectra of Graphite and MF Flakes

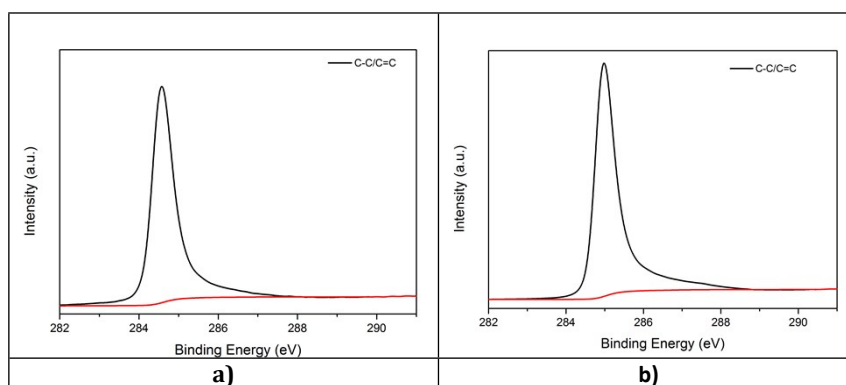

Figure S2. High resolution C (1s) XPS spectrum of a) starting graphite and b) MF flakes

## Supporting Information: Joule Heating of Graphene-Based Glass Roving

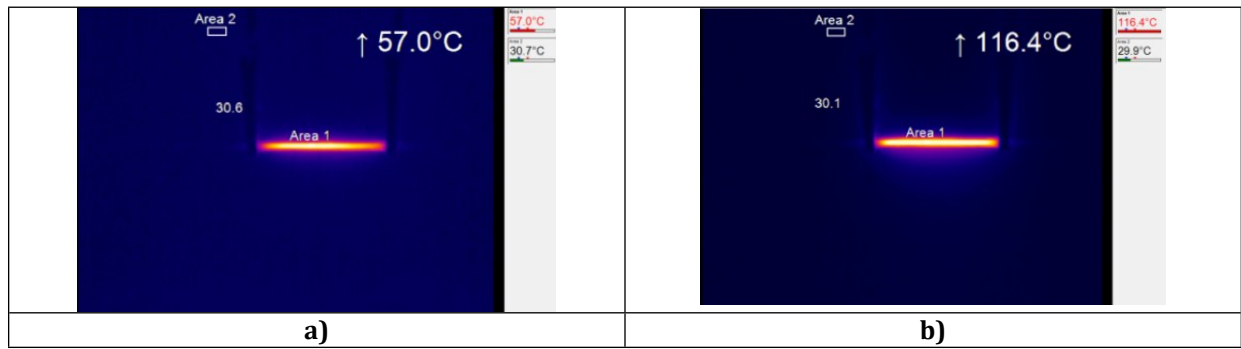

Figure S3. Thermal images of graphene-based glass rovings a) 3 V and b) 6V

## Supporting Information: Graphene-Based Glass-fibre Composite

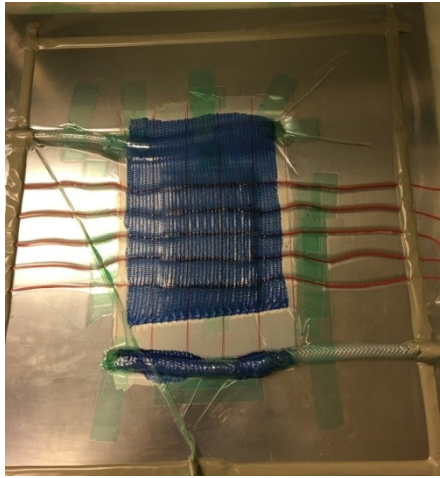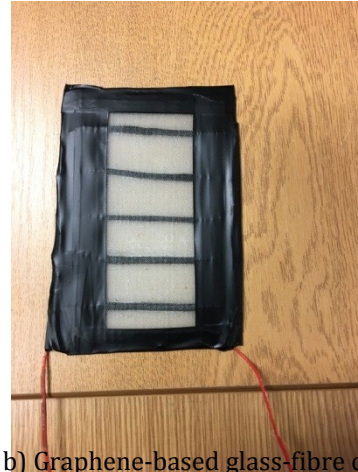

Figure S4. a) Vacuum resin infusion for making composites and b) Graphene-based glass-fibre composite for de-icing application
